# Supplementary material for: Robust calix[4]arene-polyethyleneimine coated iron oxide nanoparticles for enhanced recovery of gold and platinum chloride complexes
Source: Royal Society of Chemistry journal article supplement (doi:10.1039/d4en00408f), 2024-10-26
Supplement: d4en00408f1.pdf [file d4en00408f1.pdf]

# Supporting Information for

## Robust Calix[4]arene-Polyethyleneimine Coated Iron Oxide Nanoparticles for Enhanced Recovery of Gold and Platinum Chloride Complexes

Carlos Moya,<sup>1-3</sup> Natacha Brion,<sup>4</sup> Ludovic Troian-Gautier,<sup>5-7</sup> Ivan Jabin,<sup>7</sup> Gilles Bruylants<sup>1\*</sup>

<sup>1</sup> Engineering of Molecular NanoSystems, Ecole polytechnique de Bruxelles, Université libre de Bruxelles, Brussels 1050, Belgium

<sup>2</sup> Departament de Física de la Matèria Condensada, Universitat de Barcelona, Martí i Franquès 1, 08028 Barcelona, Spain

<sup>3</sup> Institut de Nanociència i Nanotecnologia (IN2UB), Universitat de Barcelona, 08028 Barcelona, Spain

<sup>4</sup> Analytical and Environmental Geochemistry (AMGC), Vrije Universiteit Brussel, Pleinlaan 2, 1050 Brussels, Belgium

<sup>5</sup> Université catholique de Louvain (UCLouvain), Institut de la Matière Condensée et des Nanosciences (IMCN), Molecular Chemistry, Materials and Catalysis (MOST), Place Louis Pasteur 1, bte L4.01.02, 1348 Louvain-la-Neuve, Belgium

<sup>6</sup> Wel Research Institute, Avenue Pasteur 6, 1300 Wavre, Belgium

<sup>7</sup> Laboratoire de Chimie Organique, Université libre de Bruxelles, Avenue F.D. Roosevelt, 50 B-1050 Brussels, Belgium

\*Corresponding author: gilles.bruylants@ulb.be

### Table of contents

**Figure S1.** UV-vis Calibration curve employed to quantify the Fe content in IONPs.

**Figure S2.** XRD study of naked IONPs, IONPs@X4C4, and IONPs@X4C4@PEI.

**Table S1.** XRD data for the IONP samples, including 2θ values, plane assignments, and crystal sizes.

**Table S2.** Main XRD features of naked IONPs, IONPs@X4C4, and IONPs@X4C4@PEI.

**Figure S3.** Molecular structure of the X4C4, XC, and Cit, and the corresponding functionalized IONPs.

**Figure S4.** Structural TEM characterization for the IONPs@X4.

**Figure S5.** Structural TEM characterization for the IONPs@X4@PEI.

**Figure S6.** Structural TEM characterization for the IONPs@XC.

**Figure S7.** Structural TEM characterization for the IONPs@XC@PEI.

**Figure S8.** Structural TEM characterization for the IONPs@Cit.

**Figure S9.** Structural TEM characterization for the IONPs@Cit@PEI.

**Figure S10.**  $D_{TEM}$  comparison of the prepared IONP samples.

**Figure S11.** FTIR spectra highlighting Fe–O stretching vibrations for naked IONPs, IONPs@X4C4, and IONPs@X4C4@PEI.

**Table S3.** Fe–O stretching band values of naked IONPs, IONPs@X4C4, and IONPs@X4C4@PEI.

**Figure S12.** Comparison of the FTIR spectra of the IONPs prepared in this work.

**Table S4.** The assignment of the main FTIR bands is located in Figure S10.

**Figure S13.** DLS and the  $\zeta$ -potential of the naked IONPs from pH2 to pH10 in MQH<sub>2</sub>O.

**Figure S14.** DLS and the  $\zeta$ -potential of the functionalized IONPs from pH2 to pH10 in MQ-H<sub>2</sub>O.

**Figure S15.** Comparison of the TGA curves for of the series of IONPs@XC and IONPs@Cit.

**Table S5.** Quantitative Analysis of TGA results for the series of IONPs@X4C4, IONPs@XC, and IONPs@Cit.

**Figure S16.** Comparison of the hysteresis loops at room temperature with a maximum field of  $H = \pm 50$  kOe of the IONPs prepared in this work.

**Figure S17.** Comparison of the stability studies of the naked IONPs and functionalized IONPs@X4C4, IONPs@XC, and IONPs@Cit samples in a 0.1M NaCl solution at pH7.

**Figure S18.** Monitoring the IONP core digestion under basic conditions at pH12 of the functionalized IONPs@X4C4, IONPs@XC, and IONPs@Cit samples.

**Figure S19.** Monitoring the IONP core digestion under basic conditions at pH1 of the functionalized IONPs@X4C4@PEI, IONPs@XC@PEI, and IONPs@Cit@PEI samples.

**Figure S20.** Comparison of the collection efficiency for Au employing naked IONPs, IONPs@X4C4, and IONPs@X4C4@PEI samples.

**Figure S21.** Au collection efficiency for IONPs@X4C4@PEI and IONPs@Cit@PEI.

**Table S6** compares IONP systems for Au<sup>3+</sup> extraction, highlighting adsorption capacities, conditions, and methodologies.

**Figure S22.** Gallery of TEM images showing IONPs@X4C4@PEI after one collection process in synthetic Pt chloride solutions.

**Figure S23.** Released of (a) Au (III) and (b) Pt (IV) under three different conditions.

**Figure S24.** Remaining metal concentration post-extraction at 25°C (left) and 50°C (right) in a metal mix ( $[Zn] = [Cu] = 3x[Au, Pt]$ ;  $[Au] = 76 \mu\text{g/L}$ ) at pH8.

**Figure S25.** Au collection capacity of the IONPs@X4C4@PEI sample in the WetOX solution across various conditions.

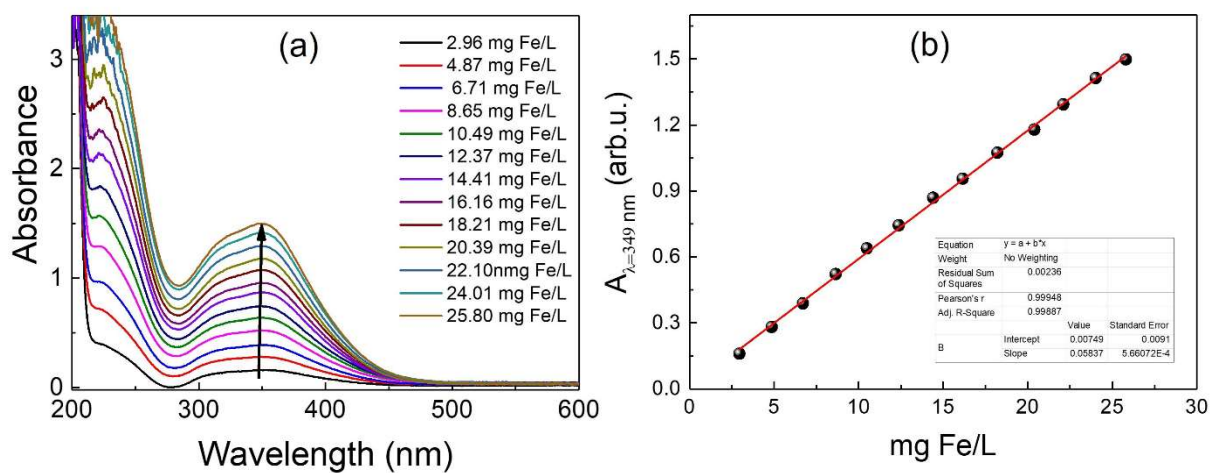

**Figure S1. Calibration curve employed to quantify the Fe in the IONPs by the UV-vis protocol.<sup>1</sup>** (a) Fe standard curves ranging from 200 to 800nm for [HCl]=5M employing FeCl<sub>3</sub> as the Fe source. (b) The calibration curve was obtained from the Fe standard curves with an R<sup>2</sup> of 0.99954.

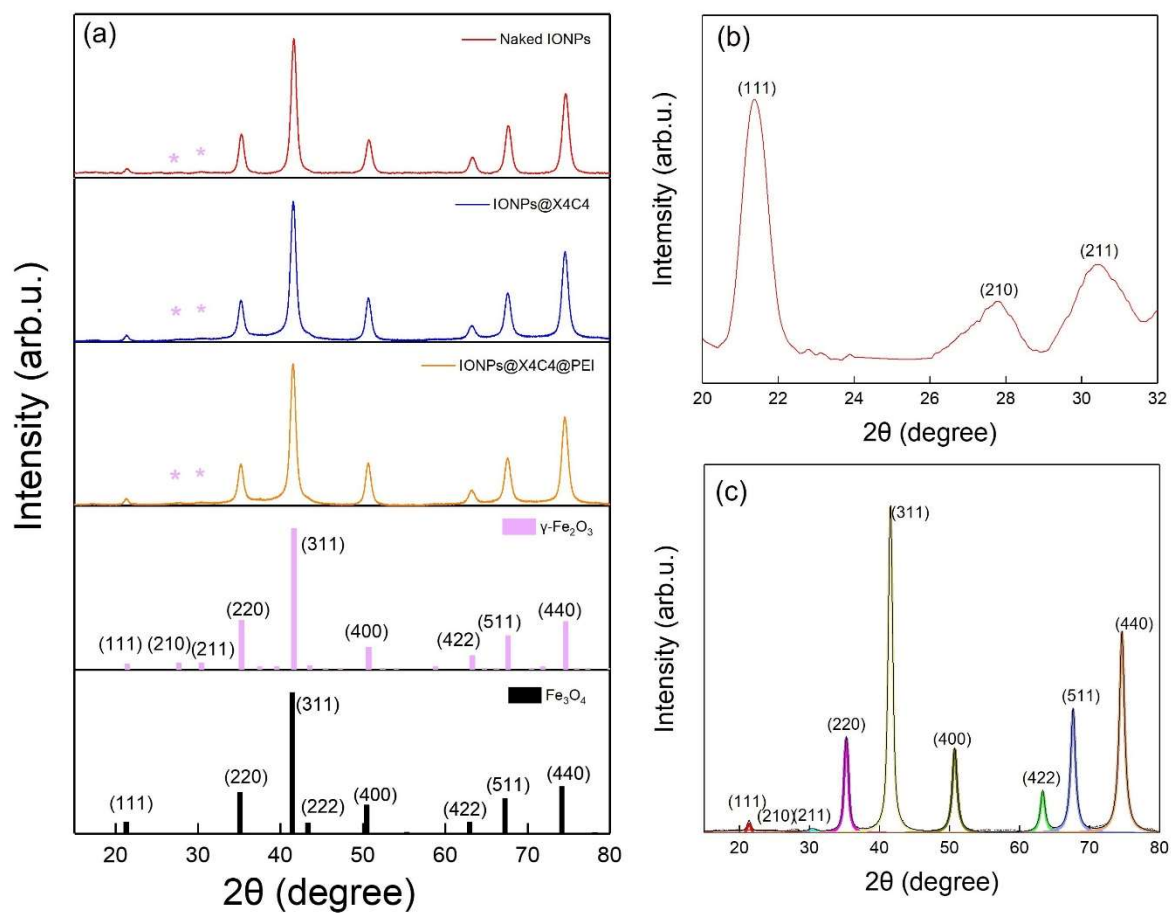

**Figure S2.** (a) XRD spectra from 15° to 80° for naked IONPs, IONPs@X4C4, and IONPs@X4C4@PEI, shown alongside reference patterns for the  $\gamma\text{-Fe}_2\text{O}_3$  (ICSD: 00-039-1346) and  $\text{Fe}_3\text{O}_4$  (ICSD: 01-089-3854) phases. (b) Zoomed-in section of the XRD spectrum for the naked IONPs, highlighting the peaks corresponding to the (111), (210), and (211) planes. (c) Voigt fitting of the XRD data from 15° to 80° for the naked IONPs sample.

**Table S1.** Detailed comparison of XRD data for (a) naked IONPs, (b) IONPs@X4C4, and (c) IONPs@X4C4@PEI. Columns from left to right show the experimental  $2\theta$  values for each sample, the assigned family of planes, the corresponding  $2\theta$  values from  $\gamma$ -Fe<sub>2</sub>O<sub>3</sub> (ICSD: 00-039-1346), Fe<sub>3</sub>O<sub>4</sub> (ICSD: 01-089-3854), the absolute differences for  $|2\theta_{exp} - 2\theta_{\gamma\text{-Fe}_2\text{O}_3}|$  and for  $|2\theta_{exp} - 2\theta_{\text{Fe}_3\text{O}_4}|$ , the crystal size determined for each family of planes ( $D_{XRD}$ ), and the lattice constant ( $a$ ) assuming Face-Centered Cubic (FCC) structure.

(a)

| 2 $\theta$ experimentals (Naked IONPs) | Assigned family of planes | 2 $\theta$ $\gamma$ -Fe <sub>2</sub> O <sub>3</sub> (ICSD: 00-039-1346) | 2 $\theta$ Fe <sub>3</sub> O <sub>4</sub> (ICSD: 01-089-3854) | $ 2\theta_{exp} - 2\theta_{\gamma\text{-Fe}_2\text{O}_3} $ | $ 2\theta_{exp} - 2\theta_{\text{Fe}_3\text{O}_4} $ | $D_{XRD}$ (Å) | a=b=c (Å) |
|----------------------------------------|---------------------------|-------------------------------------------------------------------------|---------------------------------------------------------------|------------------------------------------------------------|-----------------------------------------------------|---------------|-----------|
| 21.40                                  | 111                       | 21.38                                                                   | 21.27                                                         | 0.02                                                       | 0.13                                                | 135.00        | 8.34      |
| 27.74                                  | 210                       | 27.68                                                                   | ---                                                           | 0.06                                                       | ---                                                 | ---           | 8.34      |
| 30.34                                  | 211                       | 30.41                                                                   | ---                                                           | 0.07                                                       | ---                                                 | ---           | 8.37      |
| 35.27                                  | 220                       | 35.27                                                                   | 35.09                                                         | 0.01                                                       | 0.19                                                | 123.64        | 8.35      |
| 41.62                                  | 311                       | 41.62                                                                   | 41.40                                                         | 0.00                                                       | 0.22                                                | 115.43        | 8.35      |
| 50.75                                  | 400                       | 50.70                                                                   | 50.46                                                         | 0.04                                                       | 0.28                                                | 114.71        | 8.35      |
| 63.32                                  | 422                       | 63.31                                                                   | 62.94                                                         | 0.01                                                       | 0.38                                                | 128.03        | 8.35      |
| 67.66                                  | 511                       | 67.63                                                                   | 67.25                                                         | 0.03                                                       | 0.42                                                | 116.43        | 8.35      |
| 74.63                                  | 440                       | 74.62                                                                   | 74.15                                                         | 0.01                                                       | 0.48                                                | 111.86        | 8.35      |

(b)

| 2 $\theta$ experimentals (IONPs@X4C4) | Assigned family of planes | 2 $\theta$ $\gamma$ -Fe <sub>2</sub> O <sub>3</sub> (ICSD: 00-039-1346) | 2 $\theta$ Fe <sub>3</sub> O <sub>4</sub> (ICSD: 01-089-3854) | $ 2\theta_{exp} - 2\theta_{\gamma\text{-Fe}_2\text{O}_3} $ | $ 2\theta_{exp} - 2\theta_{\text{Fe}_3\text{O}_4} $ | $D_{XRD}$ (Å) | a=b=c (Å) |
|---------------------------------------|---------------------------|-------------------------------------------------------------------------|---------------------------------------------------------------|------------------------------------------------------------|-----------------------------------------------------|---------------|-----------|
| 21.27                                 | 111                       | 21.38                                                                   | 21.27                                                         | 0.11                                                       | 0                                                   | 124           | 8.40      |
| 27.82                                 | 210                       | 27.68                                                                   | ---                                                           | 0.14                                                       | ---                                                 | ---           | 8.32      |
| 30.54                                 | 211                       | 30.41                                                                   | ---                                                           | 0.13                                                       | ---                                                 | ---           | 8.32      |
| 35.22                                 | 220                       | 35.27                                                                   | 35.09                                                         | 0.04                                                       | 0.14                                                | 109           | 8.36      |
| 41.56                                 | 311                       | 41.62                                                                   | 41.40                                                         | 0.07                                                       | 0.16                                                | 110           | 8.36      |
| 50.69                                 | 400                       | 50.70                                                                   | 50.46                                                         | 0.01                                                       | 0.23                                                | 133           | 8.36      |
| 63.60                                 | 422                       | 63.31                                                                   | 62.94                                                         | 0.29                                                       | 0.66                                                | 121           | 8.32      |
| 67.60                                 | 511                       | 67.63                                                                   | 67.25                                                         | 0.03                                                       | 0.35                                                | 119           | 8.36      |
| 74.56                                 | 440                       | 74.62                                                                   | 74.15                                                         | 0.06                                                       | 0.41                                                | 119           | 8.35      |

(c)

| 2 $\theta$ experimentals (IONPs@X4C4@PEI) | Assigned family of planes | 2 $\theta$ $\gamma$ -Fe <sub>2</sub> O <sub>3</sub> (ICSD: 00-039-1346) | 2 $\theta$ Fe <sub>3</sub> O <sub>4</sub> (ICSD: 01-089-3854) | $ 2\theta_{exp} - 2\theta_{\gamma\text{-Fe}_2\text{O}_3} $ | $ 2\theta_{exp} - 2\theta_{\text{Fe}_3\text{O}_4} $ | $D_{XRD}$ (Å) | a=b=c (Å) |
|-------------------------------------------|---------------------------|-------------------------------------------------------------------------|---------------------------------------------------------------|------------------------------------------------------------|-----------------------------------------------------|---------------|-----------|
| 21.26                                     | 111                       | 21.38                                                                   | 21.27                                                         | 0.12                                                       | 0.01                                                | 145           | 8.40      |
| 27.67                                     | 210                       | 27.68                                                                   | ---                                                           | 0                                                          | ---                                                 | ---           | 8.36      |
| 30.36                                     | 211                       | 30.41                                                                   | ---                                                           | 0.05                                                       | ---                                                 | ---           | 8.37      |
| 35.28                                     | 220                       | 35.27                                                                   | 35.09                                                         | 0.01                                                       | 0.19                                                | 118           | 8.35      |
| 41.47                                     | 311                       | 41.62                                                                   | 41.40                                                         | 0.15                                                       | 0.07                                                | 119           | 8.38      |
| 50.89                                     | 400                       | 50.70                                                                   | 50.46                                                         | 0.19                                                       | 0.43                                                | 128           | 8.33      |
| 63.57                                     | 422                       | 63.31                                                                   | 62.94                                                         | 0.26                                                       | 0.63                                                | 130           | 8.32      |
| 67.82                                     | 511                       | 67.63                                                                   | 67.25                                                         | 0.19                                                       | 0.58                                                | 123           | 8.33      |
| 74.92                                     | 440                       | 74.62                                                                   | 74.15                                                         | 0.30                                                       | 0.77                                                | 137           | 8.32      |

**Table S2.** Summary of  $D_{XRD}$ ,  $a$ , and their corresponding standard deviations for the naked IONPs, IONPs@X4C4, and IONPs@X4C4@PEI samples, derived from the average values presented in Table 1. These results are compared with reference data for  $\gamma$ -Fe<sub>2</sub>O<sub>3</sub> (ICSD: 00-039-1346) and Fe<sub>3</sub>O<sub>4</sub> (ICSD: 01-089-3854).

| determined average $a$ (Å) | Standard deviation (Å) | $a$ $\gamma$ -Fe <sub>2</sub> O <sub>3</sub> (00-039-1346)(Å) | $a$ Fe <sub>3</sub> O <sub>4</sub> (01-089-3854 (Å) |
|----------------------------|------------------------|---------------------------------------------------------------|-----------------------------------------------------|
| 8.35                       | 0.01                   | 8.35                                                          | 8.39                                                |
| 8.35                       | 0.02                   | 8.35                                                          | 8.39                                                |
| 8.35                       | 0.03                   | 8.35                                                          | 8.39                                                |

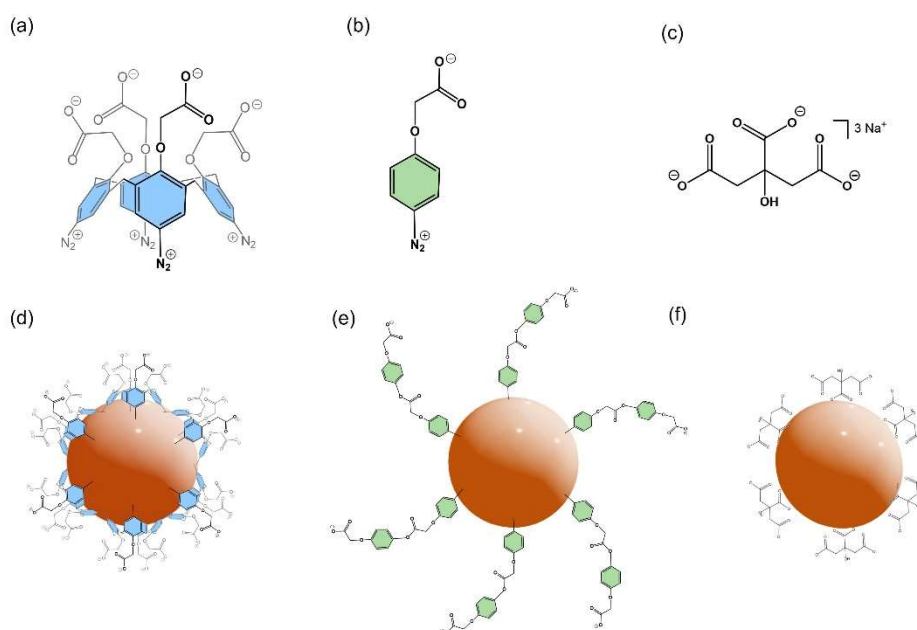

**Figure S3. Molecular representation of the organic agents utilized to functionalize the IONPs.** (a) and (b) Show the diazonium salts of X4C4 and XC under their acidic form, respectively. (c) Trisodium citrate. Representation of the functionalized IONPs. (d) IONPs@X4C4, (e) IONPs@XC, and (f) IONPs@Cit.

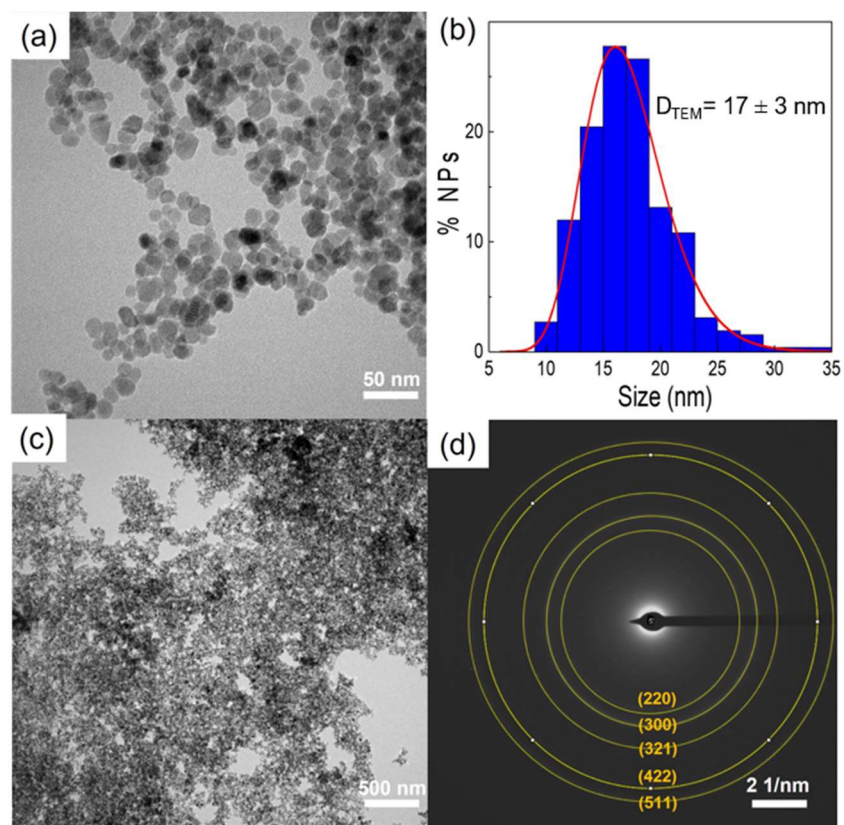

**Figure S4. TEM characterization for the sample IONPs@X4C4.** (a) High magnification TEM image (scale bare of 50 nm). (b) Particle size distribution with an average size of  $17 \pm 3 \text{ nm}$ . (c) Low magnification TEM image (scale bar of 500 nm) and its corresponding SAED characterization showing the intense pattern rings of the  $\gamma\text{-Fe}_2\text{O}_3$  phase.



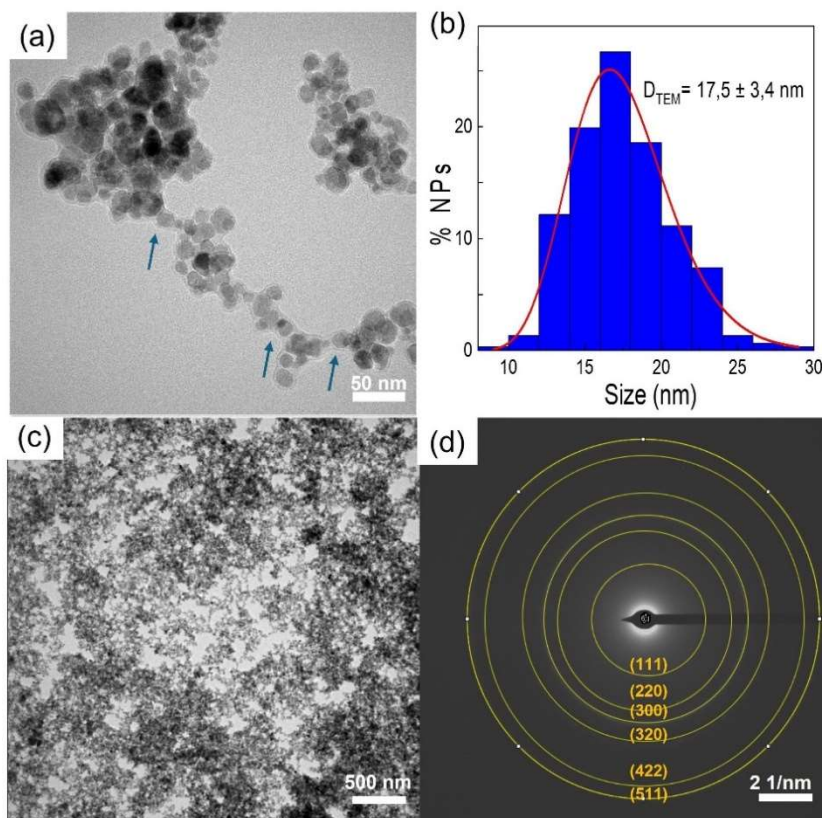

**Figure S5. TEM characterization for the sample IONPs@X4C4@PEI.** (a) High magnification TEM image (scale bar of 50 nm). (b) Particle size distribution with an average size of  $18 \pm 3$  nm. (c) Low magnification TEM image (scale bar of 500 nm) and its corresponding SAED characterization showing the intense pattern rings of the  $\gamma$ -Fe<sub>2</sub>O<sub>3</sub> phase.



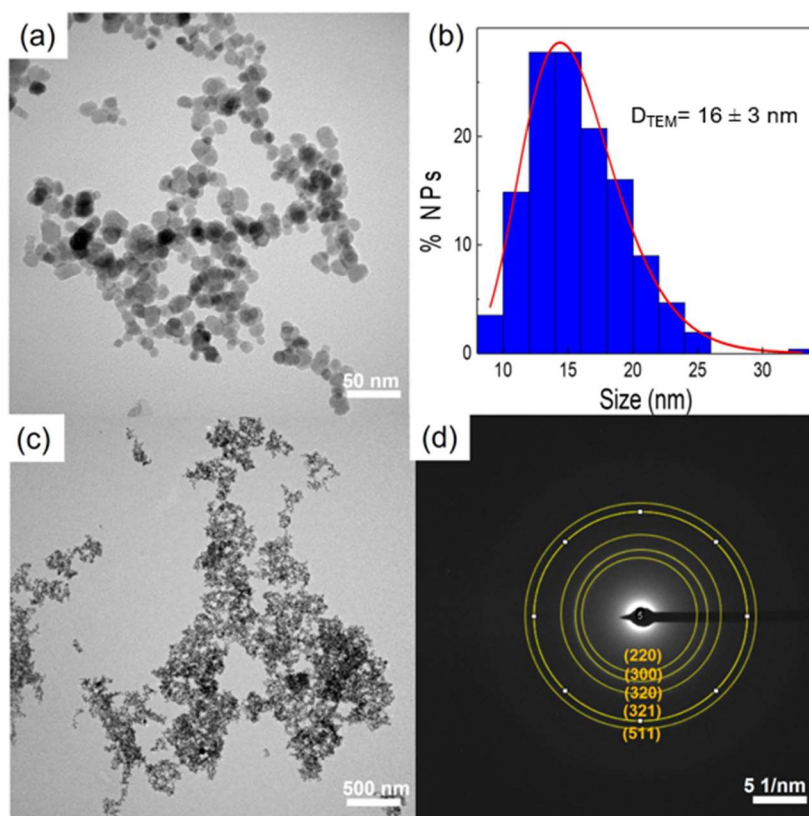

**Figure S6. TEM characterization for the sample IONPs@XC.** (a) High magnification TEM image (scale bare of 50 nm). (b) Particle size distribution with an average size of  $16 \pm 3 \text{ nm}$ . (c) Low magnification TEM image (scale bar of 500 nm) and its corresponding SAED characterization showing the intense pattern rings of the  $\gamma\text{-Fe}_2\text{O}_3$  phase.

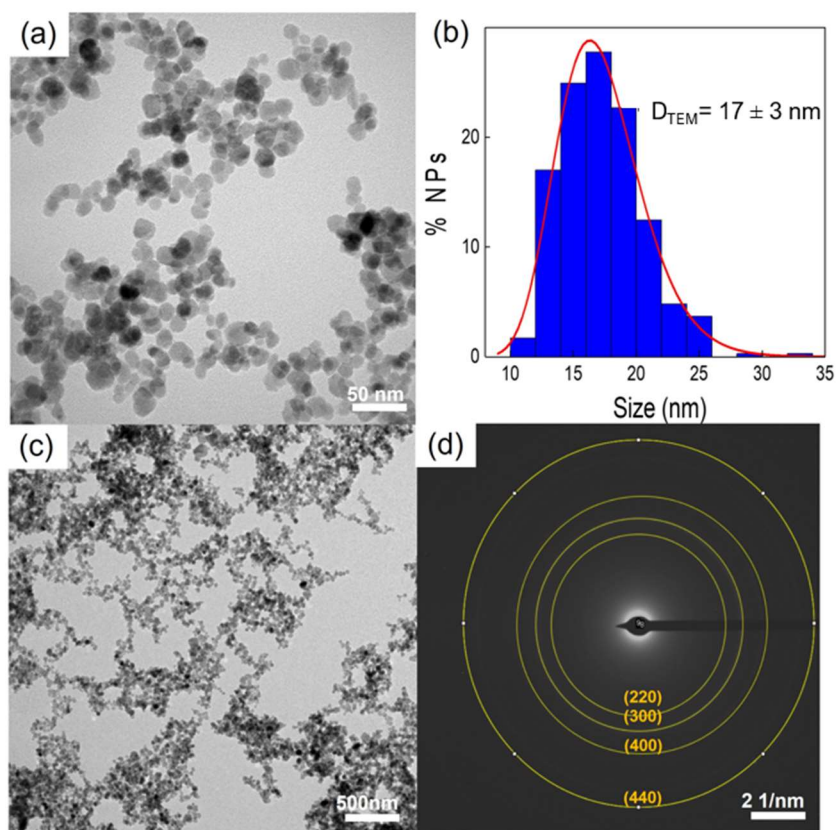

**Figure S7. TEM characterization for the sample IONPs@XC@PEI.** (a) High magnification TEM image (scale bare of 50 nm). (b) Particle size distribution with an average size of  $17 \pm 3$  nm. (c) Low magnification TEM image (scale bar of 500 nm) and its corresponding SAED characterization showing the more intense pattern rings of the  $\gamma$ -Fe<sub>2</sub>O<sub>3</sub> phase

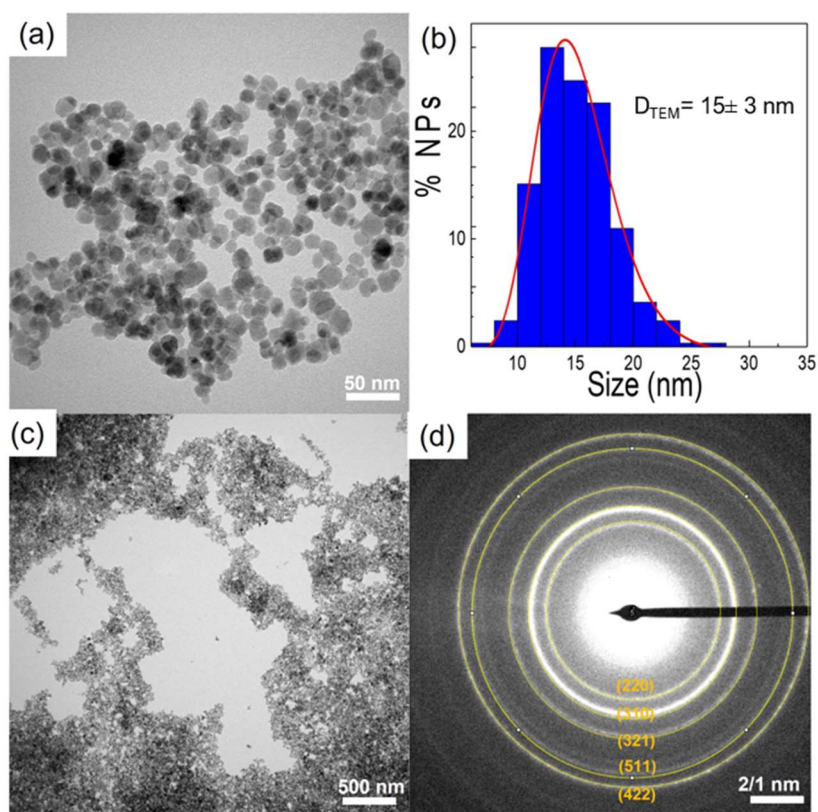

**Figure S8. TEM characterization for the sample IONPs@Cit.** (a) High magnification TEM image (scale bare of 50 nm). (b) Particle size distribution with an average size of  $15 \pm 3$  nm. (c) Low magnification TEM image (scale bar of 500 nm) and its corresponding SAED characterization showing the more intense pattern rings of the  $\gamma$ -Fe<sub>2</sub>O<sub>3</sub> phase.

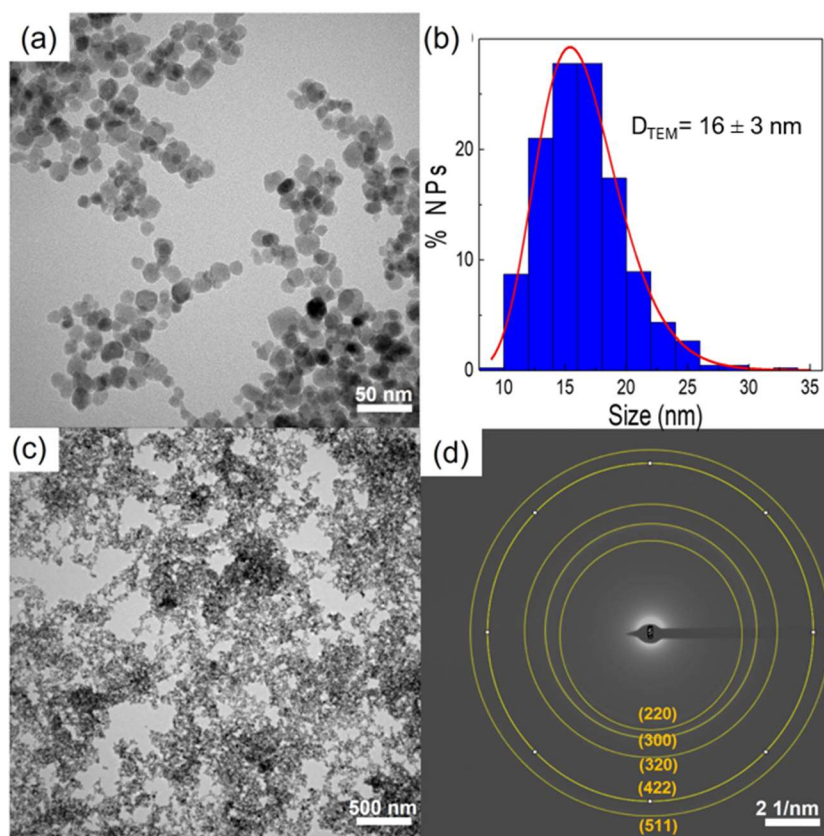

**Figure S9. TEM characterization for the sample IONPs@Cit@PEI.** (a) High magnification TEM image (scale bar of 50 nm). (b) Particle size distribution with an average size of  $16 \pm 3$  nm. (c) Low magnification TEM image (scale bar of 500 nm) and its corresponding SAED characterization showing the more intense pattern rings of the  $\gamma$ -Fe<sub>2</sub>O<sub>3</sub> phase.

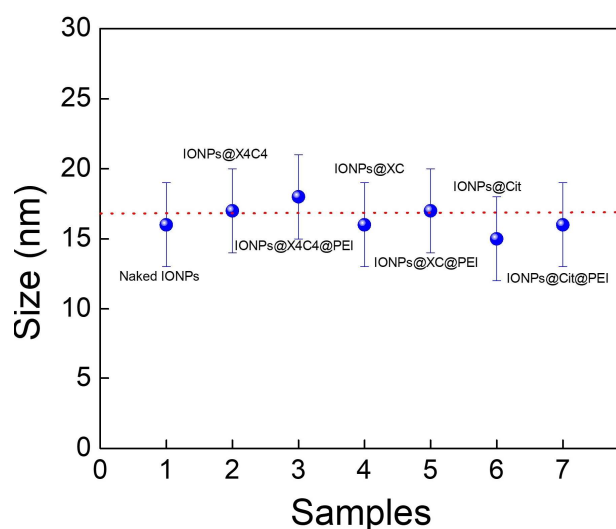

**Figure S10.** Graphical comparison of the  $D_{TEM}$  of the different batches of IONPs. The dotted line is centered on the average  $D_{TEM} = 16.4$  nm of all the samples.

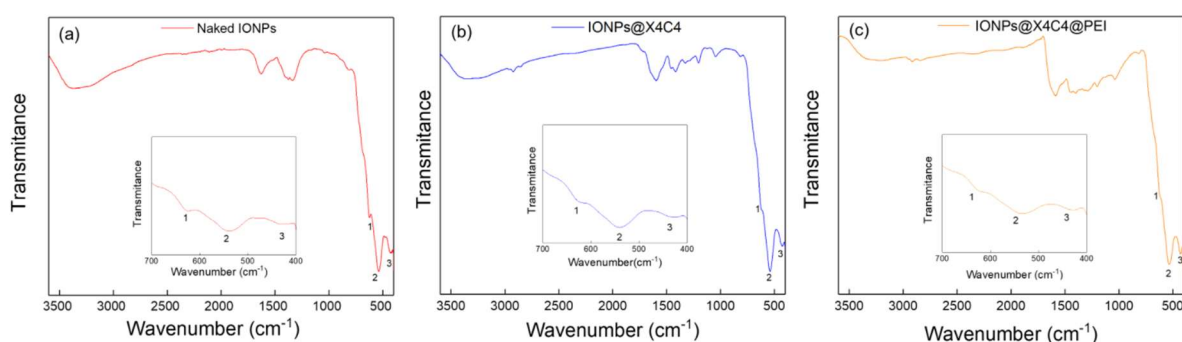

**Figure S11.** FTIR spectra of (a) naked IONPs, (b) IONPs@X4C4, and (c) IONPs@X4C4@PEI analyzed using a Thermo SCIENTIFIC NICOLET iZ10 infrared spectrometer, with measurements conducted over a spectral range of 400 to 4000  $\text{cm}^{-1}$  at a resolution of 1  $\text{cm}^{-1}$ . The insets show the FTIR spectra at lower wavenumber, focusing on the main absorption bands corresponding to the Fe–O stretching vibrations, labeled as 1, 2, and 3.

**Table S3.** FTIR peak positions for naked IONPs, IONPs@X4C4, and IONPs@X4C4@PEI, compared to the reference peaks for  $\gamma\text{-Fe}_2\text{O}_3$  and  $\text{Fe}_3\text{O}_4$ .<sup>2</sup>

|                                | peak 1 ( $\text{cm}^{-1}$ ) | peak 2 ( $\text{cm}^{-1}$ ) | peak 3 ( $\text{cm}^{-1}$ ) |
|--------------------------------|-----------------------------|-----------------------------|-----------------------------|
| naked IONPs                    | 626                         | 537                         | 430                         |
| IONPs@X4C4                     | 626                         | 540                         | 430                         |
| IONPs@X4C4@PEI                 | 627                         | 535                         | 428                         |
| $\gamma\text{-Fe}_2\text{O}_3$ | 630                         | 590                         | 430                         |
| $\text{Fe}_3\text{O}_4$        | 570                         |                             | 390                         |

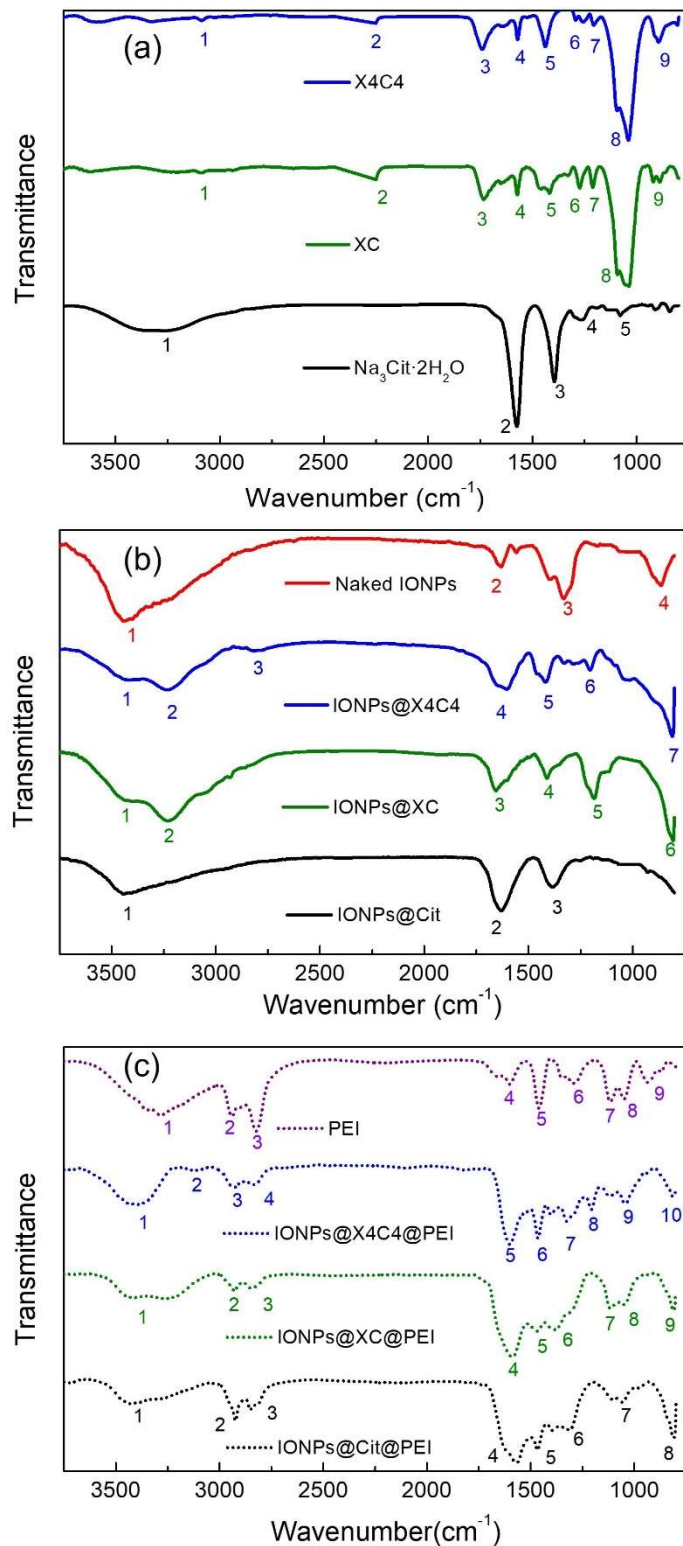

**Figure S12** . FTIR spectra from 3750 to 750 cm<sup>-1</sup> for (a) the organic coating molecules used in this work. X4C4-teradiazonium, XC-diazonium, and Na<sub>3</sub>Cit·2H<sub>2</sub>O. (b) FTIR spectra for the IONPs@X4C4, IONPs@XC, and IONPs@Cit samples. (c) FTIR spectra of the PEI functionalized series of samples and their comparison with that of the PEI polymer.

**Table S4.** Main FTIR bands corresponding to Figure S10.(a) Functionalization agents X4C4-tetra-diazonium, XC-diazonium, and Cit employed for the functionalization of IONPs. (b) Functionalized IONPs@X4C4, IONPs@XC, and IONPs@Cit samples. (c) PEI coated functionalized IONP samples.

(a)

| <b>X4C4-tetra-diazonium</b>              | <b>Band (cm<sup>-1</sup>)</b> | <b>Functional group</b>     |
|------------------------------------------|-------------------------------|-----------------------------|
| 1                                        | 3084                          | C-H st                      |
| 2                                        | 2253                          | N-N st                      |
| 3                                        | 1740                          | C=O st (RCOO <sup>-</sup> ) |
| 4                                        | 1566                          | Asy COO <sup>-</sup> st     |
| 5                                        | 1422                          | Sy COO <sup>-</sup> st      |
| 6                                        | 1274                          | C-O st (phenoxy)            |
| 7                                        | 1182                          | C-O st (aromatic)           |
| 8                                        | 1033                          | C-O st (ether)              |
| 9                                        | 889                           | C-H bend (aromatic)         |
| <b>XC-diazonium</b>                      | <b>Band (cm<sup>-1</sup>)</b> | <b>Functional group</b>     |
| 1                                        | 3084                          | C-H st                      |
| 2                                        | 2258                          | N-N st                      |
| 3                                        | 1730                          | C=O st (RCOO <sup>-</sup> ) |
| 4                                        | 1570                          | Asy COO <sup>-</sup> st     |
| 5                                        | 1427                          | Sy COO <sup>-</sup> st      |
| 6                                        | 1273                          | C-O st (phenoxy)            |
| 7                                        | 1187                          | C-O st (aromatic)           |
| 8                                        | 1048                          | C-O st (ether)              |
| 9                                        | 909                           | C-H bend (aromatic)         |
| <b>Na<sub>3</sub>Cit·2H<sub>2</sub>O</b> | <b>Band (cm<sup>-1</sup>)</b> | <b>Functional group</b>     |
| 1                                        | 3289                          | O-H st                      |
| 2                                        | 1566                          | Asy COO <sup>-</sup> st     |
| 3                                        | 1381                          | Sy COO <sup>-</sup> st      |
| 4                                        | 1253                          | C-O st (COO <sup>-</sup> )  |
| 5                                        | 1069                          | C-O-C st                    |



(b)

| <b>Naked IONPs</b> | <b>Band (cm<sup>-1</sup>)</b> | <b>Functional group</b>                 |
|--------------------|-------------------------------|-----------------------------------------|
| 1                  | 3443                          | O-H st                                  |
| 2                  | 1643                          | O-H ben (H <sub>2</sub> O)              |
| 3                  | 1325                          | Asy N-O (NO <sub>3</sub> <sup>-</sup> ) |
| 4                  | 851                           | O-H ben (out of plane)                  |
| <b>IONPs@X4C4</b>  | <b>Band (cm<sup>-1</sup>)</b> | <b>Functional group</b>                 |
| 1                  | 3396                          | O-H st                                  |
| 2                  | 3227                          | O-H st (sec)                            |
| 3                  | 2843                          | C-H st                                  |
| 4                  | 1616                          | Asy COO <sup>-</sup> st                 |
| 5                  | 1416                          | Sy COO <sup>-</sup> st                  |
| 6                  | 1211                          | C-O st (ether)                          |
| 7                  | 811                           | C-H bend (aromatic)                     |
| <b>IONPs@XC</b>    | <b>Band (cm<sup>-1</sup>)</b> | <b>Functional group</b>                 |
| 1                  | 3421                          | O-H st                                  |
| 2                  | 3211                          | O-H st (sec)                            |
| 3                  | 1658                          | Asy COO <sup>-</sup> st                 |
| 4                  | 1391                          | Sy COO <sup>-</sup> st                  |
| 5                  | 1181                          | C-O st (ether)                          |
| 6                  | 802                           | C-H bend (aromatic)                     |
| <b>IONPs@Cit</b>   | <b>Band (cm<sup>-1</sup>)</b> | <b>Functional group</b>                 |
| 1                  | 3442                          | O-H st                                  |
| 2                  | 1622                          | Asy COO <sup>-</sup> st                 |
| 3                  | 1386                          | Sy COO <sup>-</sup> st                  |

(c)

| PEI            | Band (cm <sup>-1</sup> ) | Functional group       |
|----------------|--------------------------|------------------------|
| 1              | 3278                     | N-H st                 |
| 2              | 2950                     | Asy C-H st             |
| 3              | 2817                     | Sy C-H st              |
| 4              | 1607                     | N-H ben                |
| 5              | 1458                     | C-H ben                |
| 6              | 1284                     | C-N st (sec.amine)     |
| 7              | 1110                     | C-N st (constrain)     |
| 8              | 1037                     | C-N st (prim.amine)    |
| 9              | 930                      | N-H wag                |
| IONPs@X4C4@PEI | Band (cm <sup>-1</sup> ) | Functional group       |
| 1              | 3411                     | O-H st                 |
| 2              | 3119                     | C-H st (aliphatic)     |
| 3              | 2924                     | Asy C-H st             |
| 4              | 2806                     | Sy C-H st              |
| 5              | 1607                     | N-H ben                |
| 6              | 1453                     | C-H ben                |
| 7              | 1325                     | Sy COO <sup>-</sup> st |
| 8              | 1202                     | C-N st (sec.amine)     |
| 9              | 1028                     | C-N st (prim.amine)    |
| 10             | 812                      | C-H bend (aromatic)    |
| IONPs@XC@PEI   | Band (cm <sup>-1</sup> ) | Functional group       |
| 1              | 3432                     | O-H st                 |
| 2              | 3243                     | C-H st (aliphatic)     |
| 3              | 2919                     | Asy C-H st             |
| 4              | 2821                     | Sy C-H st              |
| 5              | 1586                     | N-H ben                |
| 6              | 1463                     | C-H ben                |
| 7              | 1381                     | Sy COO <sup>-</sup> st |
| 8              | 1110                     | C-N st (constrain)     |
| 9              | 1028                     | C-N st (prim.amine)    |
| 10             | 812                      | C-H bend (aromatic)    |
| IONPs@Cit@PEI  | Band (cm <sup>-1</sup> ) | Functional group       |
| 1              | 3416                     | O-H st                 |
| 2              | 2919                     | Asy C-H st             |
| 3              | 2837                     | Sy C-H st              |
| 4              | 1566                     | N-H ben                |
| 5              | 1453                     | C-H ben                |
| 6              | 1320                     | Sy COO <sup>-</sup> st |
| 7              | 1048                     | C-N st (prim.amine)    |
| 8              | 802                      | C-H bend (aromatic)    |

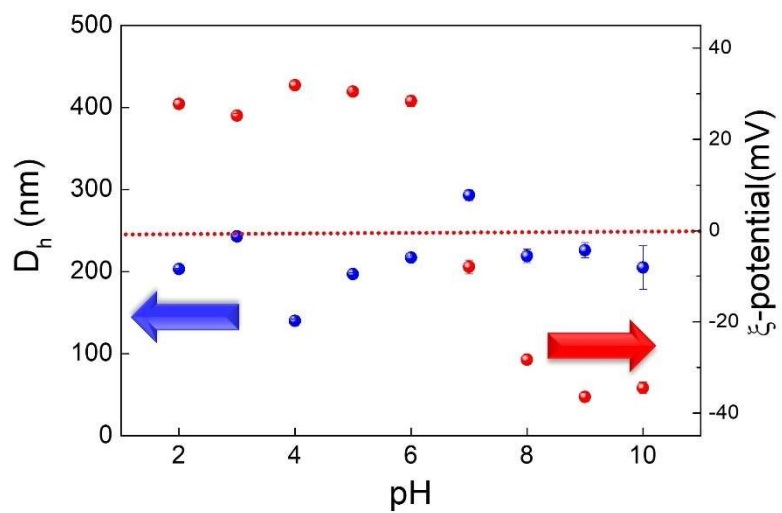

**Figure S13.** Correlation of  $D_h$ , (blue dots) and  $\zeta$ -potential (red dots) of the naked IONPs from pH 2 to 10 in MQ-H<sub>2</sub>O. The blue dots represent  $D_h$  measured in nanometers (nm), with the scale on the left indicated by the blue arrow, while the red dots denote  $\zeta$ -potential in millivolts (mV), with the scale on the right highlighted by the red arrow.

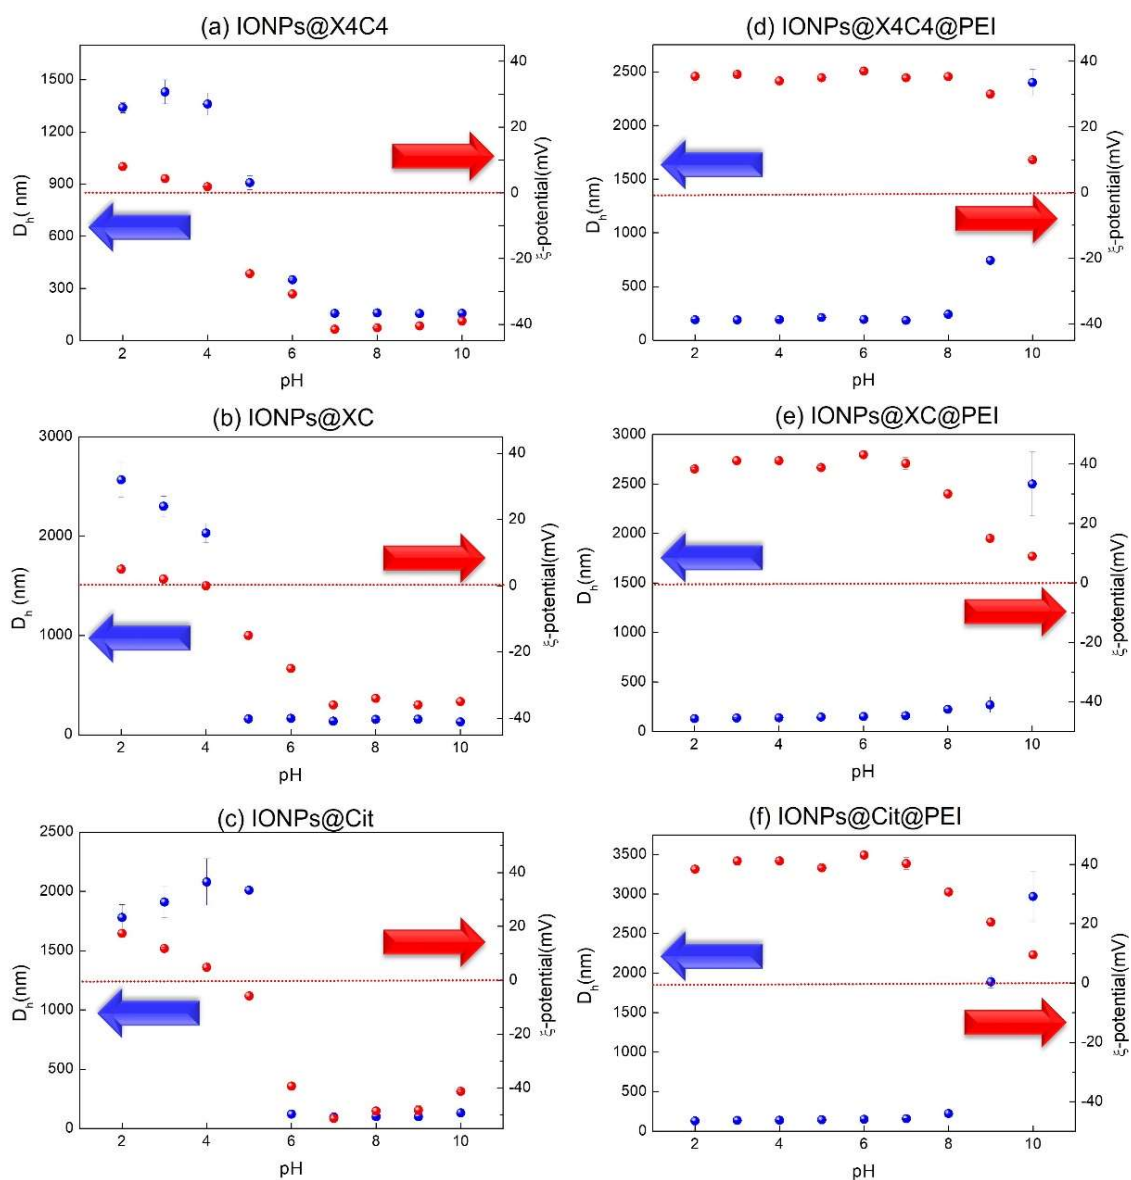

**Figure S14.** pH-dependent  $D_h$ , (blue dots) and  $\zeta$ -potential (red dots) for the functionalized IONPs synthesized in this work from pH 2 to 10 in MQ-H<sub>2</sub>O. The left-side panel shows the behavior of the (a) IONPs@X4C4, (b) IONPs@XC, and (c) IONPs@Cit samples. The right-side panel shows the pH dependence of these two parameters for the PEI-coated IONPs. (d) IONPs@X4C4@PEI, (e) IONPs@XC@PEI, and (f) IONPs@Cit@PEI samples.

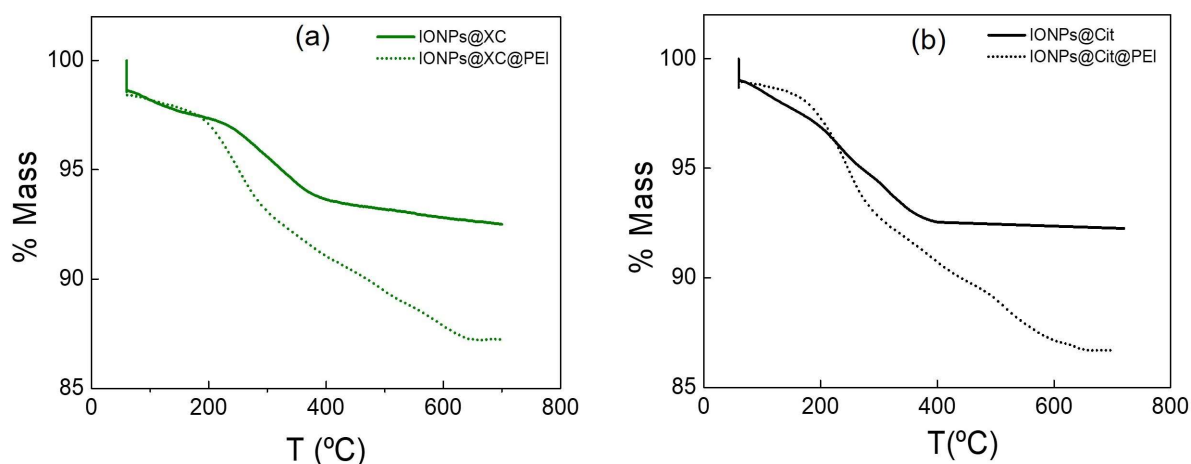

**Figure S15.** TGA curves of the (a) IONPs@XC, and IONPs@XC@PEI, and (b) IONPs@Cit, and IONPs@Cit@PEI samples.

**Table S5.** Quantitative Analysis of TGA results for the functionalized samples. Calculations were done assuming spherical shape IONPs according to the  $D_{TEM}$ . IONP's Volume (V) and Surface Area (S) derived from  $V = 4/3 \pi R^3$  and  $S = 4\pi R^2$  equations, respectively. Where R stands for the IONP's radius.

| Functionalization agent                                     | X4C4           | PEI (X4C4@PEI)  | XC              | PEI (XC@PEI)    | Cit            | PEI (Cit@PEI)   |
|-------------------------------------------------------------|----------------|-----------------|-----------------|-----------------|----------------|-----------------|
| % Organic fraction                                          | 14             | 9               | 6               | 5               | 6              | 5               |
| MW (g/mol)                                                  | 664            | 25000           | 152.14          | 25000           | 189.1          | 25000           |
| $D_{TEM} \pm \sigma$ (nm)                                   | $17 \pm 3$     | $18 \pm 3$      | $16 \pm 3$      | $17 \pm 3$      | $15 \pm 3$     | $18 \pm 3$      |
| Density $\gamma\text{-Fe}_2\text{O}_3$ (g/cm <sup>3</sup> ) | 4.9            | 4.9             | 4.9             | 4.9             | 4.9            | 4.9             |
| Volume of IONP (nm <sup>3</sup> )                           | 2572           | 3054            | 2145            | 2572            | 1767           | 3054            |
| N <sup>o</sup> molecules                                    | 6.35E+19       | 8.43E+17        | 1.19E+20        | 6.02E+17        | 9.56E+19       | 6.02E+17        |
| N <sup>o</sup> IONPs                                        | 3.37E+16       | 2.57E+16        | 4.38E+16        | 3.49E+16        | 5.31E+16       | 3.49E+16        |
| S (nm <sup>2</sup> ) IONP                                   | 908            | 1018            | 804             | 908             | 707            | 1018            |
| (Organic molecules/IONP) $\pm \sigma$                       | $1883 \pm 733$ | $33 \pm 12$     | $2684 \pm 1254$ | $17 \pm 8$      | $1779 \pm 798$ | $17 \pm 7$      |
| (Organic molecule/nm <sup>2</sup> ) $\pm \sigma$            | $2.1 \pm 0.3$  | $0.04 \pm 0.01$ | $3.3 \pm 0.9$   | $0.02 \pm 0.01$ | $2.5 \pm 0.6$  | $0.02 \pm 0.01$ |

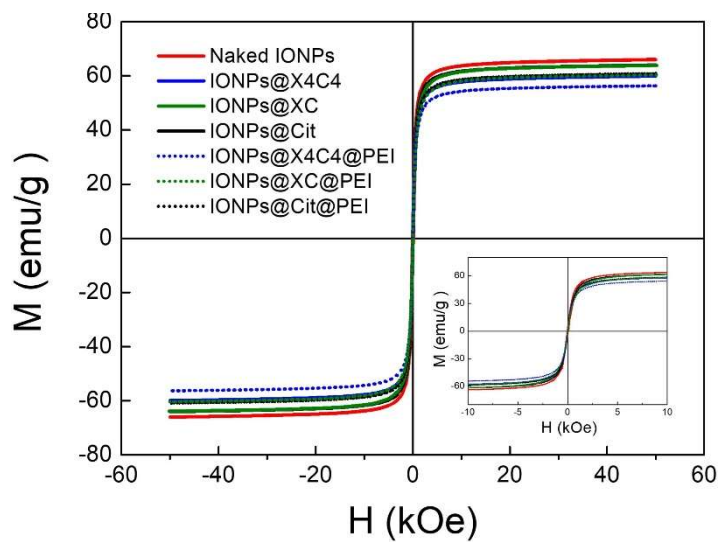

**Figure S16.** Hysteresis loops at room temperature with a maximum field of  $H = \pm 50$  kOe for the series of IONPs prepared and functionalized in this work. Naked IONPs (red plain line), IONPs@X4C4 (blue plain line), IONPs@XC (green plain line), IONPs@Cit (black plain line), IONPs@X4C4@PEI (blue dotted line), IONPs@XC@PEI (green dotted line), and IONPs@Cit@PEI (black dotted line).

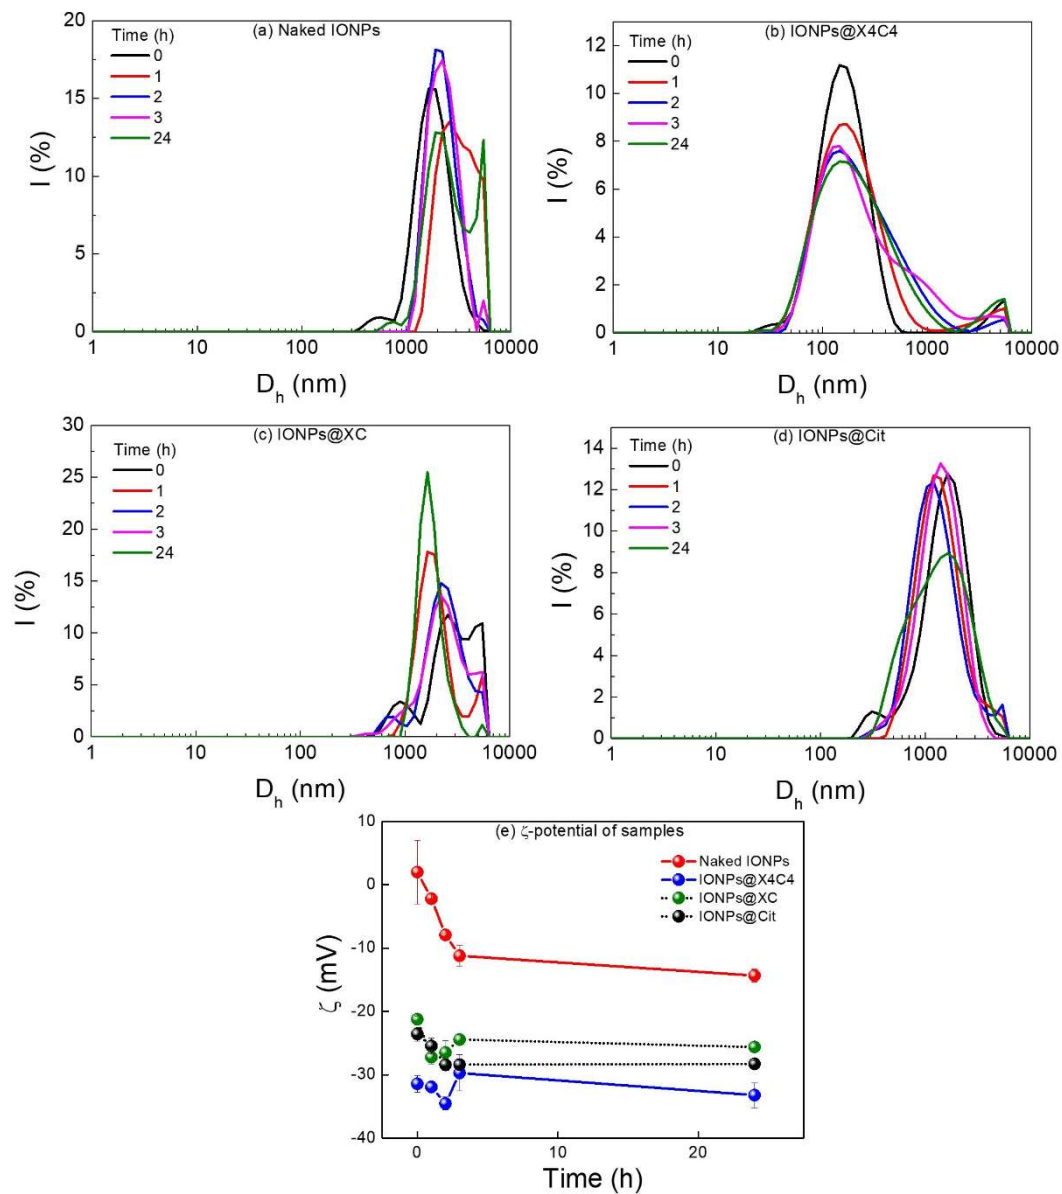

**Figure S17.** Comparative analysis of particle stability in 0.1 M NaCl at pH 7. DLS evolution of (a) naked IONPs, (b) IONPs@X4C4, (c) IONPs@XC, and (d) IONPs@Cit samples for the following incubation times: 0, 1, 2, 3, and 24h. (e) Evolution of the  $\zeta$ -potential of the samples over 24h in 0.1 M NaCl at pH 7.



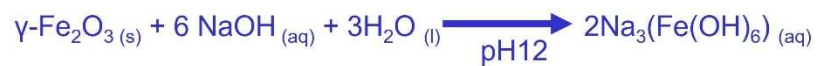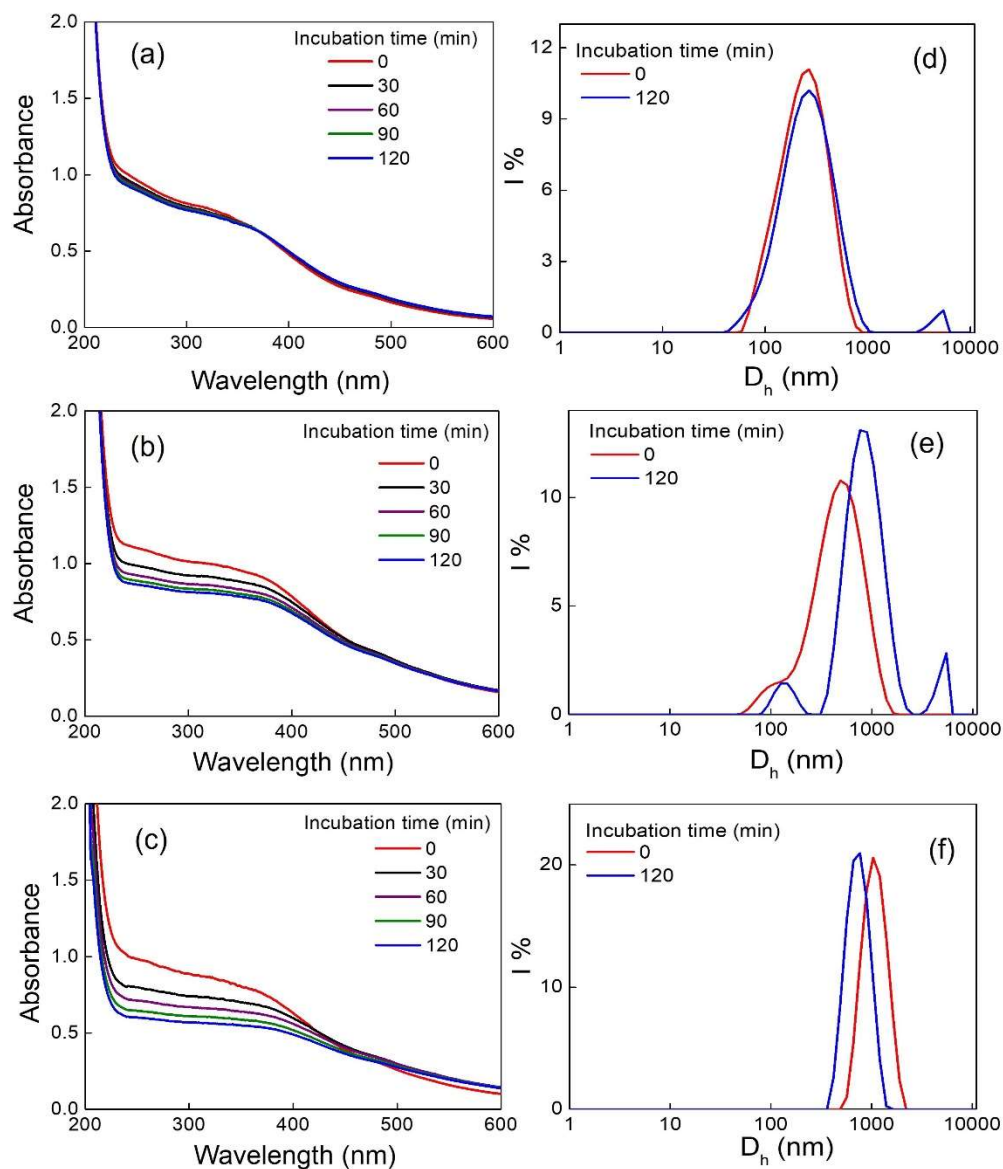

**Figure S18.** Monitoring of the IONP core digestion at pH 12 of the functionalized IONPs. UV-Vis absorption spectra as a function of time of (a) IONPs@X4C4, (b) IONPs@XC, and (c) IONPs@Cit samples. DLS curves at 0 and after 120 min of incubation at pH12 of the functionalized IONPs. (d) IONPs@X4C4, (e) IONPs@XC, and (f) IONPs@Cit samples.

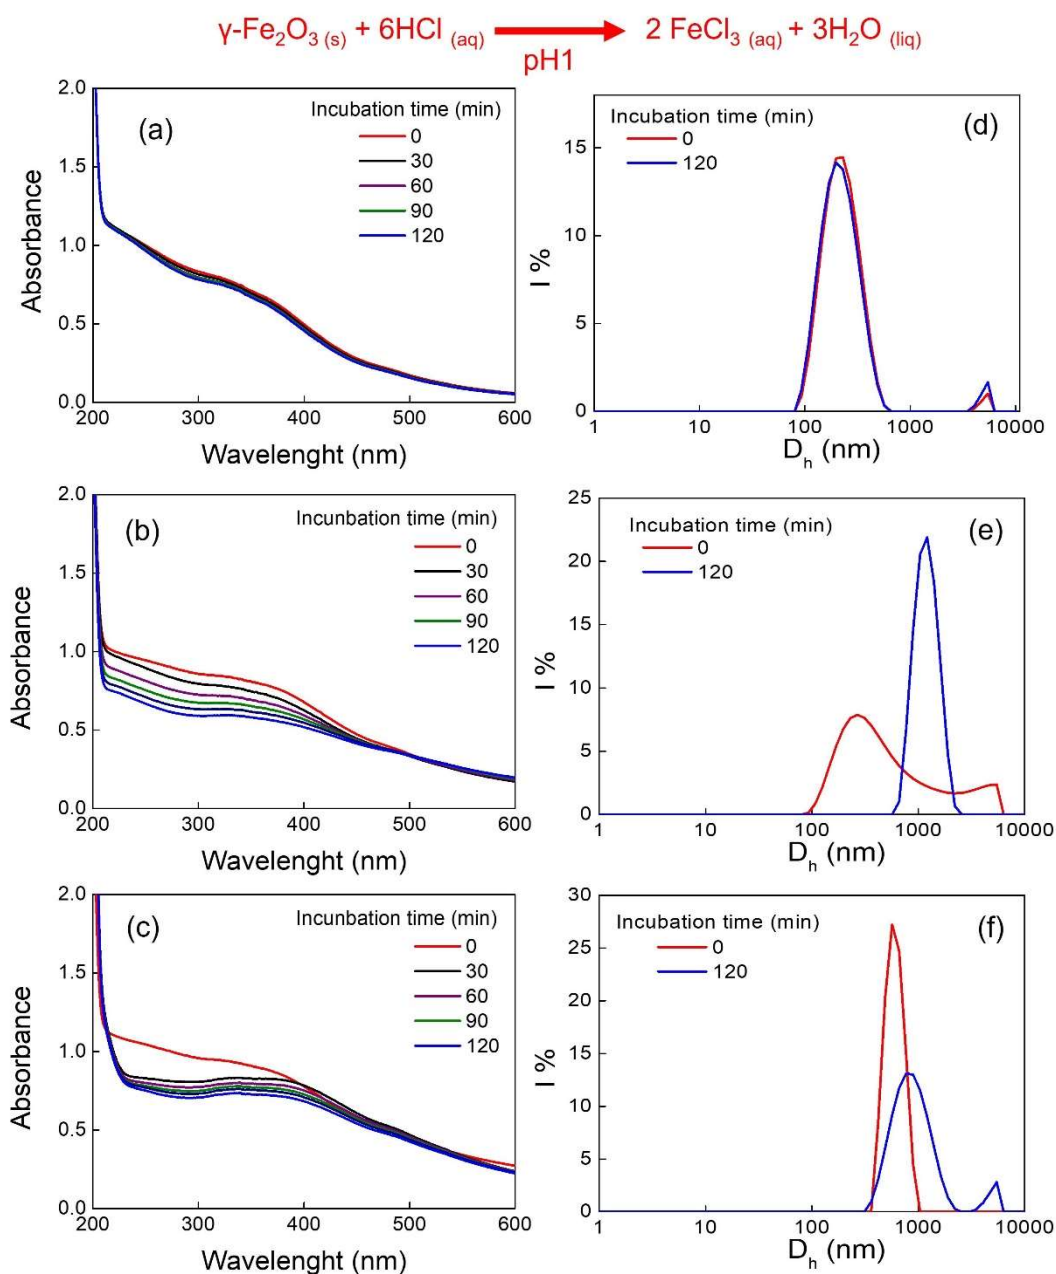

**Figure S19.** Monitoring of the IONP core digestion at pH 1 of the functionalized IONPs. UV-Vis absorption spectra as a function of time of (a) IONPs@X4C4@PEI, (b) IONPs@XC@PEI, and (c) IONPs@Cit@PEI samples. DLS curves at 0 and after 120 min of incubation at pH1 of the functionalized IONPs. (d) IONPs@X4C4@PEI, (e) IONPs@XC@PEI, and (f) IONPs@Cit@PEI samples.

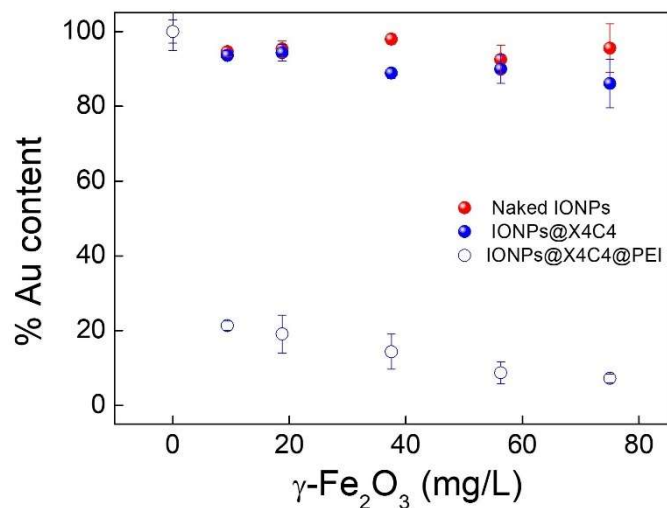

**Figure S20.** Comparison of Au remaining in the supernatant at pH8 after collection experiments with naked IONPs (red solid spheres), IONPs@X4C4 (blue solid spheres), and IONPs@X4C4@PEI (blue empty spheres) as a function of the total amount of particles (quantified as the weight of  $\gamma\text{-Fe}_2\text{O}_3$  added) added.

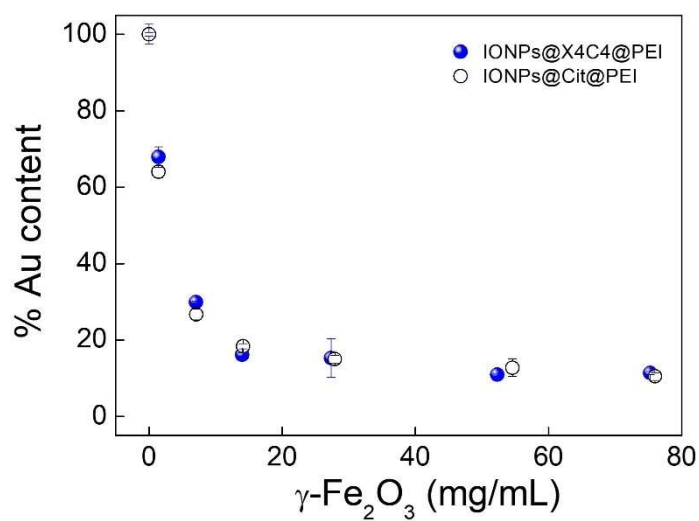

**Figure S21.** Comparison of Au remaining in the supernatant at pH8 after collection experiments with IONPs@X4C4@PEI (blue solid spheres) and IONPs@Cit@PEI (black empty spheres) samples as a function of the total amount of particles (quantified as the weight of  $\gamma\text{-Fe}_2\text{O}_3$  added) added.

**Table S6.** Comparison of various IONP systems for the extraction of Au<sup>3+</sup> ions from different aqueous environments. The table summarizes the type of particles used, their gold adsorption capacities (Q, in mAu<sup>3+</sup>/gIONP), experimental conditions, Au<sup>3+</sup> concentration, release methodology, and references.

| Work             | Type of particle                                | Q (mgAu <sup>3+</sup> )/gIONP) | Conditions                                                               | Au <sup>3+</sup> concentration (mg/L) | Release methodology / % release                                                                                                                             | Reference |
|------------------|-------------------------------------------------|--------------------------------|--------------------------------------------------------------------------|---------------------------------------|-------------------------------------------------------------------------------------------------------------------------------------------------------------|-----------|
| 1                | Naked IONPs                                     | 2.3                            | pH 6.5, NaCl concentration varied from 0.1 M to 3.0 M, incubation of 24h | 10-100                                | Not described                                                                                                                                               | 3         |
| 2                | IONPs@squamides                                 | Not described                  | pH 2, AuCl <sub>4</sub> , 25°C, reduction of Au, 2h of incubation        | 5                                     | Not described                                                                                                                                               | 4         |
| 3                | IONPs@Cit@PEI                                   | 42.5                           | pH 8, 0.1 M thiosulfate, 25°C, from 1-24h of incubation                  | 10                                    | Addition of 0.01 M NaOH up to pH 12. Magnetic separation and gold collection from the supernatant. Nearly 100% released                                     | 5         |
| <b>This work</b> | <b>IONPs@X4C4@PEI</b>                           | <b>12.6</b>                    | <b>pH 8, 25°C, from 0 to 1h</b>                                          | <b>0.076</b>                          | <b>Addition of thiourea at pH 3. Magnetic separation and gold collection from the supernatant. Nearly 100% released</b>                                     |           |
| <b>This work</b> | <b>IONPs@Cit@PEI</b>                            | <b>12.8</b>                    | <b>pH 8, 25°C, from 0 to 1h</b>                                          | <b>0.076</b>                          | <b>Addition of thiourea at pH 3. Magnetic separation and gold collection from the supernatant. Nearly 100% released</b>                                     |           |
| 5                | Chitosan resine embedding IONPs                 | 709.2                          | pH 0.5, incubation times from 0.15 to 2h                                 | 2364                                  | Addition of 0.5 M thiourea acidified with 0.2 M H <sub>2</sub> SO <sub>4</sub> . Flow rate of 1 mL/min and thorough washing for reuse. Nearly 100% released | 6         |
| 6                | IONPs@Moringa proteins                          | 107                            | 2h at pH 2.5                                                             | 10                                    | Not described                                                                                                                                               | 7         |
| 7                | CoFe <sub>2</sub> O <sub>4</sub> @MPTS          | 120                            | pH from 1 to 4                                                           | 10                                    | Addition of 1 M thiourea in 1 M HCl. 85% released                                                                                                           | 8         |
| 8                | IONPs modified with dendrimer and palmitic acid | 6.5-8.3                        | pH 3, 25°C                                                               | 9.78                                  | Desorption using 1 M HNO <sub>3</sub> , 0.5 M thiourea. 55% released                                                                                        | 9         |
| 9                | IONPs-SiO <sub>2</sub> -thiol                   | 84.75                          | pH 5, 30°C, 4 h                                                          | 20                                    | 1 mol/L HCl containing 2% thiourea. 96.2% released                                                                                                          | 10        |
| 10               | IONPs-thiourea                                  | 118.5                          | pH 2, 25°C, 0.5h                                                         | 50 to 110                             | 0.7 M thiourea and 2% HCl. Nearly 100% released                                                                                                             | 11        |

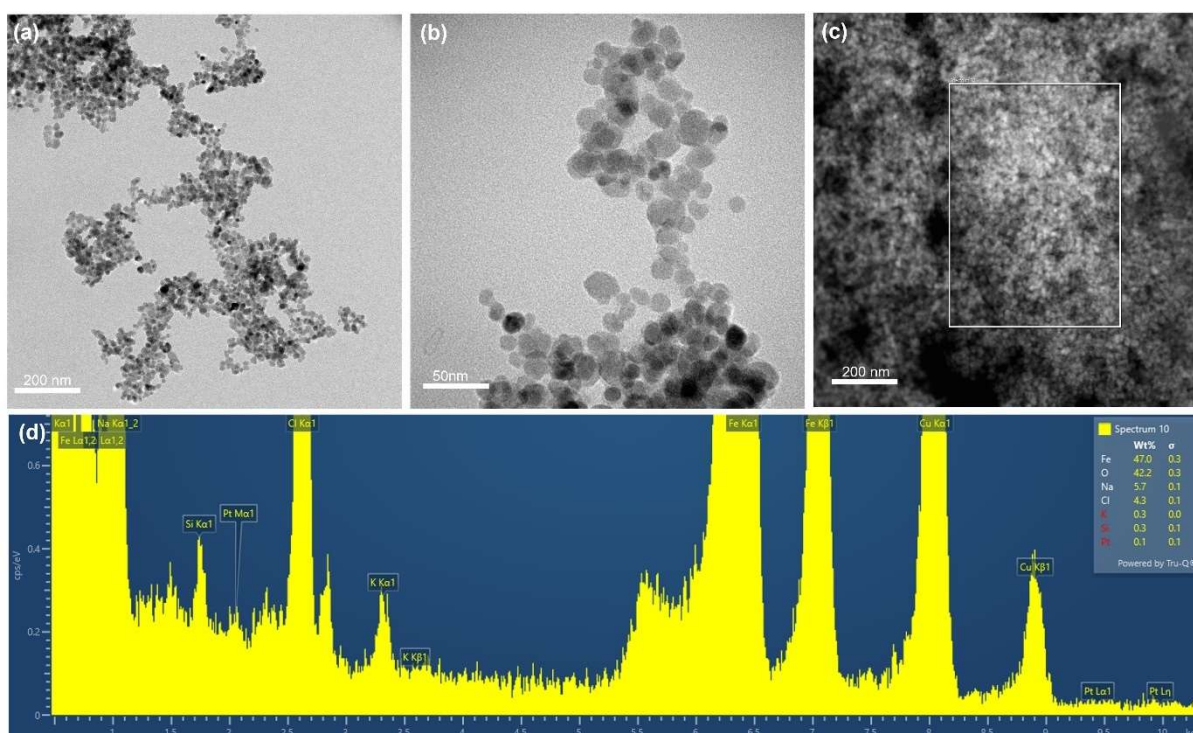

**Figure S22.** Gallery of TEM images showing IONPs@X4C4@PEI after one collection process in a synthetic Pt chloride solution. From (a) to (b) : bright field TEM images at several magnifications of IONPs@X4C4@PEI particles. (c) HAADF-STEM image correlated with (d) an EDS spectrum analysis for elemental composition determination.

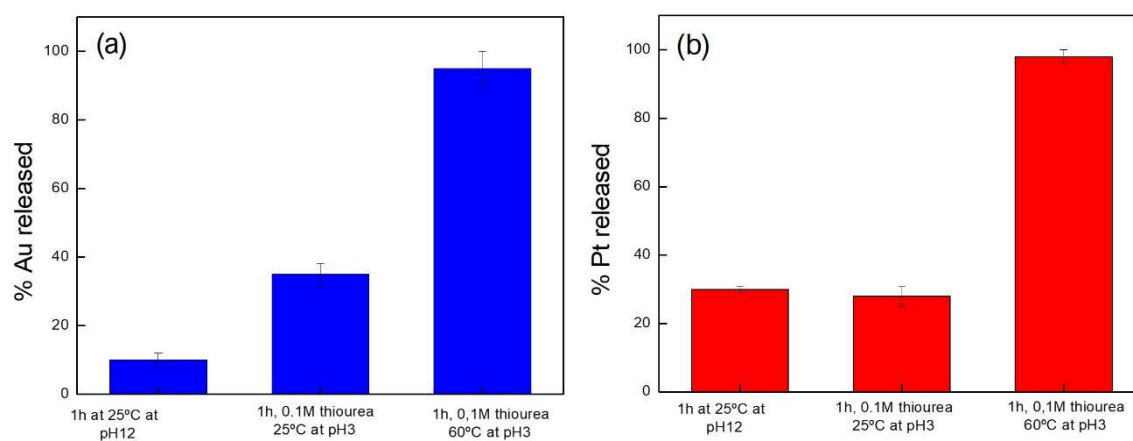

**Figure S23.** (a) Au(III) and (b) Pt(IV) released from the IONPs@X4C4@PEI under three different conditions.

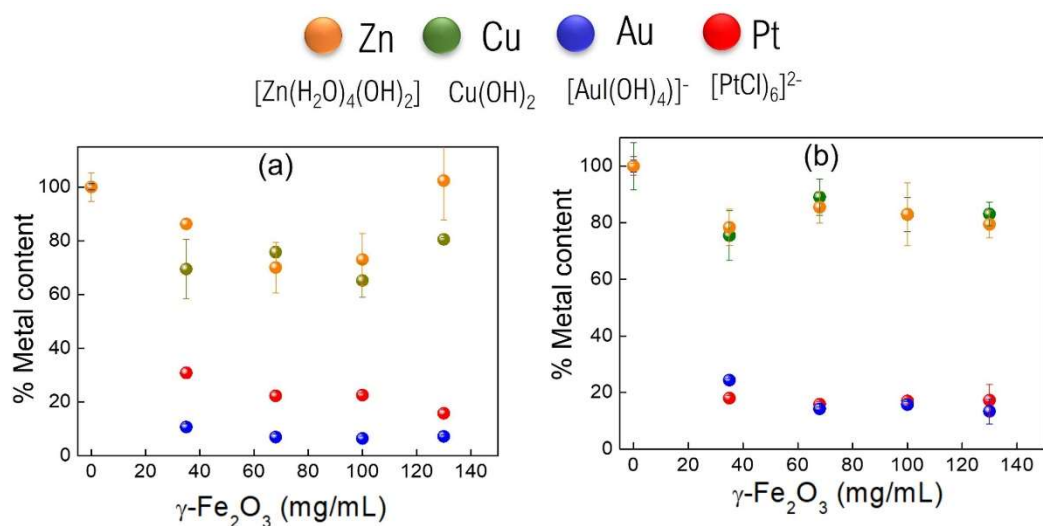

**Figure S24.** Percentage of the initial metal concentration remaining in supernatant after extraction experiments at 25°C (left) and 50°C (right) for a mixture of metals containing  $[\text{Zn}] = [\text{Cu}] = 3x[\text{Au}, \text{Pt}]$  and  $[\text{Au}]$  equal to 76  $\mu\text{g/L}$ .

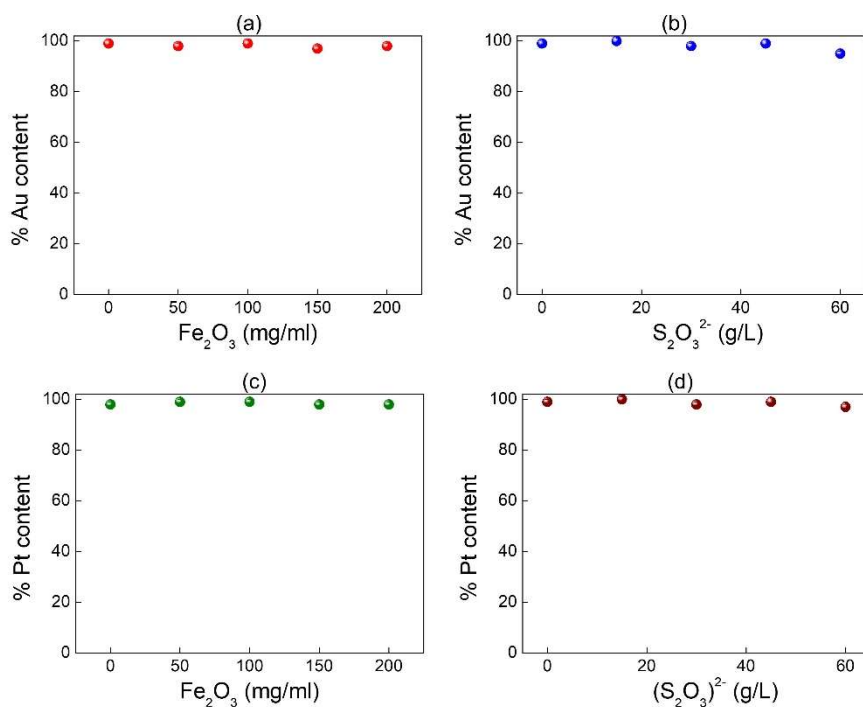

**Figure S25.** Collection capacity of the IONPs@X4C4@PEI sample in WetOX after 12 hours of incubation at 50°C under various conditions. (a) and (c) show the % Au and % Pt content, respectively, when using increasing concentrations of IONPs, ranging from 0 to 184 mg  $\text{Fe}_2\text{O}_3/\text{ml}$ . (b) and (d) display the % Au and % Pt content, respectively, after incubating the particles with an 184 mg  $\text{Fe}_2\text{O}_3/\text{ml}$  concentration and increasing amounts of  $(\text{S}_2\text{O}_3)^{2-}$ .

## References

1. Torras, M.; Moya, C.; Pasquevich, G. A.; Roig, A. Accurate Iron Quantification in Colloids and Nanocomposites by a Simple UV-Vis Protocol. *Microchim. Acta* **2020**, *187* (9), 488-498.
2. S. P. Schwaminger, D. Bauer, P. Fraga-García, F. E. Wagner and S. Berensmeier, *CrystEngComm*, **2017**, *19*, 246-255.
3. A.R.M. Calderon, R.D. Alorro, B. Tadesse, K. Yoo and C.B. Tabelin, *JOM*, **2019**, *71*, 4183-4191.
4. P. Duel, M. S. Gutiérrez, P. Rodríguez, A. León, K. A. López, J. Morey and M. N. Piña, *RSC Adv.*, **2018**, *8*, 36123 -36132.
5. N.D. Ilankoon, C. Aldrich, E.A. Oraby and J.J. Eksteen, *Hydrometallurgy*, **2020**, *195*, 105375.
6. A.M. Donia, A.A. Atia and K.Z. Elwakeel, *Hydrometallurgy*, **2007**, *87*, 197-206.
7. M.O.N. Amuanyena, M. Kandawa-Schulz and H.M. Kwaambwa, *J. Biomater. Nanobiotechnol.*, **2019**, *10*, 142-158.
8. A. Kraus, K. Jainae, F. Unob and N. Sukpirom, *J. Colloid Interface Sci.*, **2009**, *338*, 359-365.
9. J. T. Khutlane, K. R. Koch and R. Malgas-Enus, *SN Appl. Sci.*, **2020**, *2*, 1125.
10. Y. Zhang, Q. Xu, S. Zhang, J. Liu, J. Zhou, H. Xu, H. Xiao and J. Li, *Sep. Purif. Technol.*, **2013**, *116*, 391-397.
11. Tai-Lin Lin and Hsing-Lung Lien, *Int. J. Mol. Sci.*, **2013**, *14*, 9834-9847.
